# Supplementary material for: High-performance Ce doped three-dimensional ordered macroporous Co-based catalysts on CO oxidation
Source: Royal Society of Chemistry journal article supplement (doi:10.1039/d2cy01242a), 2023-01-01
Supplement: d2cy01242a1.pdf [file d2cy01242a1.pdf]

## *Supporting Information*

### **Highly performance Ce doped 3DOM Co-based catalyst on CO oxidation**

Kun Zhou<sup>‡</sup><sup>a</sup> · Miaomiao Hu<sup>‡</sup><sup>a,c</sup> · Tingyi Zhao<sup>a</sup> · Qingzhao Shi<sup>b</sup> · Jiaxin Feng<sup>a</sup> · Xue Ma<sup>a</sup> · Mingqin Zhao<sup>a</sup>  
· Zihui Shao<sup>a</sup> · Bing Cui<sup>a,\*</sup>

<sup>a</sup> Flavors and Fragrance Engineering & Technology Research Center of Henan Province, College of Tobacco Science, Henan Agricultural University, Zhengzhou 450002, PR China

<sup>b</sup> Key Laboratory of Tobacco Flavor Basic Research of CNTC, Zhengzhou Tobacco Research Institute of CNTC, Zhengzhou 450000, PR China.

<sup>c</sup> School of Ecology and Environment, Zhengzhou University, Zhengzhou 450001, PR China

<sup>‡</sup> These authors contributed equally to this work.

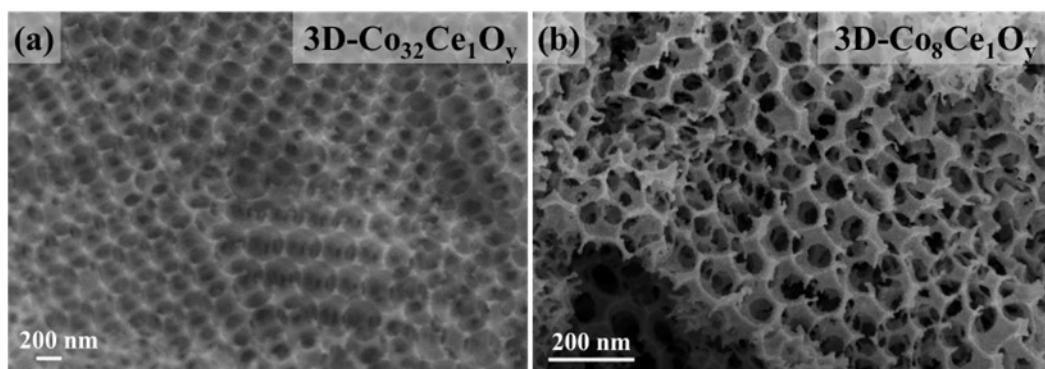

**Fig. S1** SEM images of 3D-Co<sub>32</sub>Ce<sub>1</sub>O<sub>y</sub> (a), 3D-Co<sub>8</sub>Ce<sub>1</sub>O<sub>y</sub> (b).

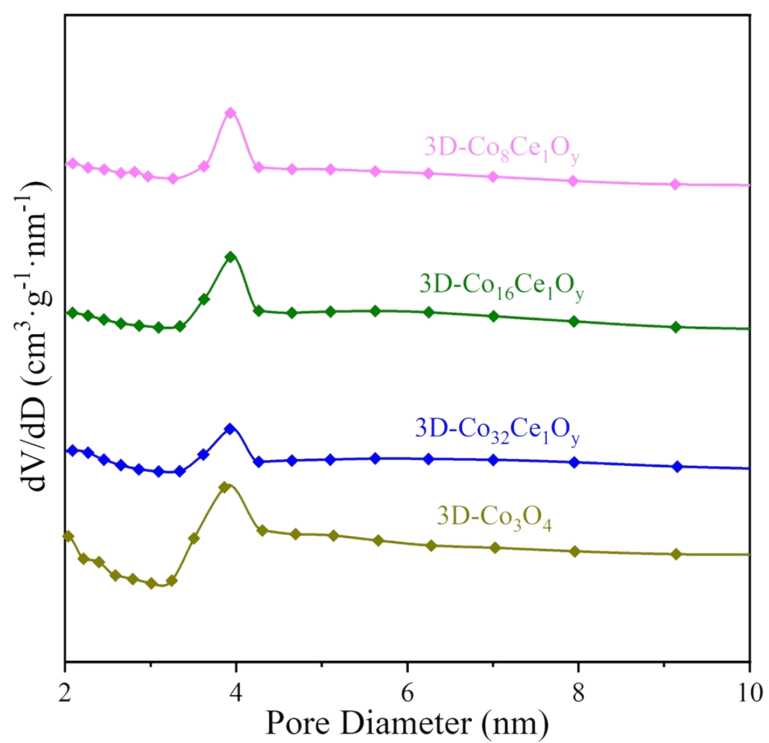

**Fig. S2** The pore size distribution of the mesoporous diagram of 3D-Co<sub>3</sub>O<sub>4</sub> and 3D-Co<sub>x</sub>Ce<sub>1</sub>O<sub>y</sub> catalysts

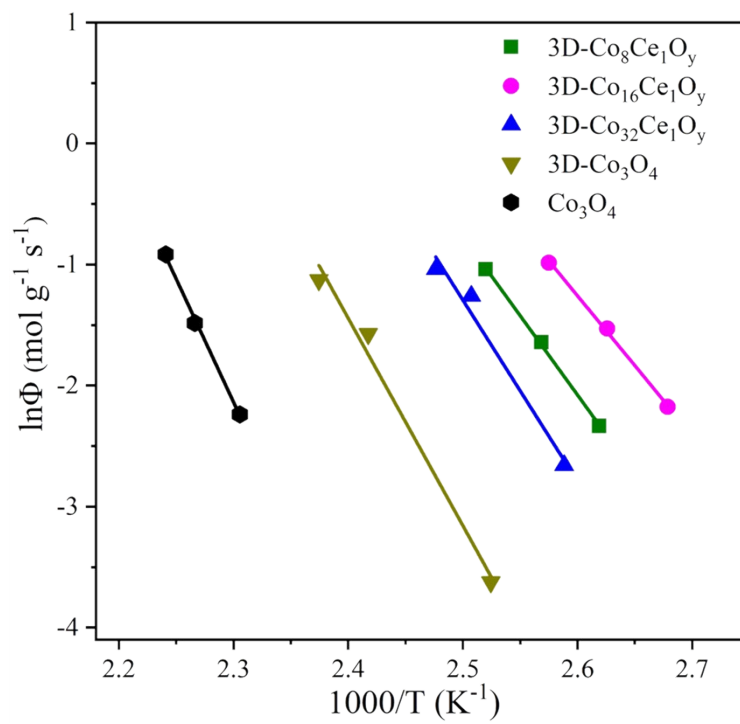

**Fig. S3** Ozawa plots over the prepared catalysts.

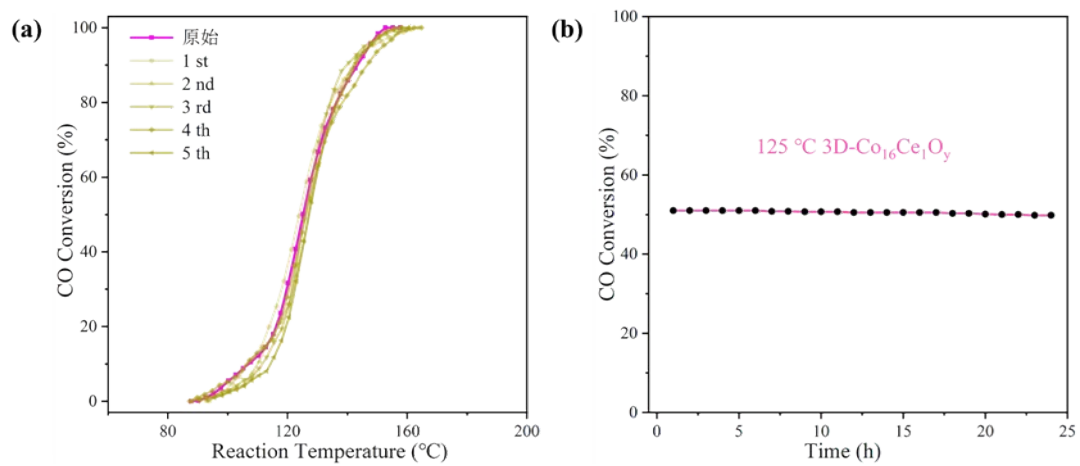

**Fig. S4.** The five-cyclic CO catalytic activity of 3D-Co<sub>16</sub>Ce<sub>1</sub>O<sub>y</sub> (a); the CO conversion of 3D-Co<sub>16</sub>Ce<sub>1</sub>O<sub>y</sub> continuous reaction at 125°C for 24 h (b). Reaction conditions: Catalysts (0.1 g), 1 vol.% CO/10 vol.% O<sub>2</sub>/89 vol.% N<sub>2</sub> with a total flow of 100 ml min<sup>-1</sup>.

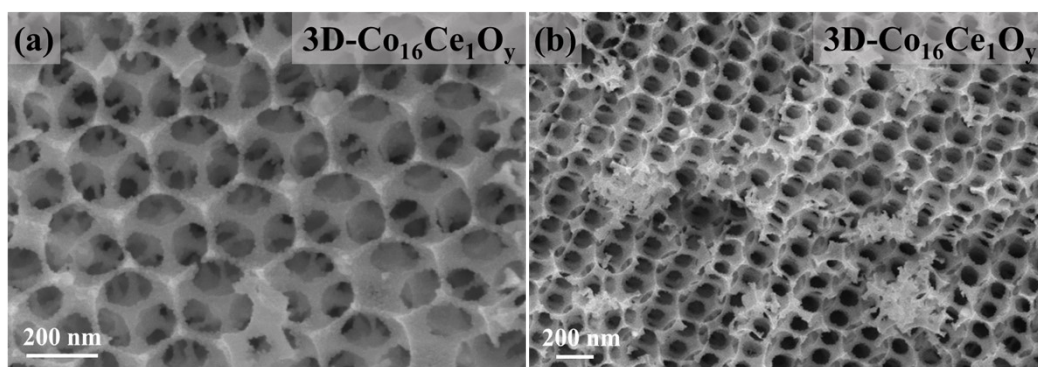

**Fig. S5.** The SEM of 3D-Co<sub>16</sub>Ce<sub>1</sub>O<sub>y</sub> after five cycles (a); the SEM of 3D-Co<sub>16</sub>Ce<sub>1</sub>O<sub>y</sub> after continuous reaction at 125°C for 24 h (b).

**Table S1** Literature on CO catalytic activity of other transition metal and Co-based catalysts.

| Types                      | Sample                                             | Reaction conditions                                                                                                                          | Catalyst (mg) | T <sub>50</sub> (°C) | Ref       |
|----------------------------|----------------------------------------------------|----------------------------------------------------------------------------------------------------------------------------------------------|---------------|----------------------|-----------|
| Transition metal catalysts | Ce <sub>0.9</sub> Fe <sub>0.1</sub> O <sub>2</sub> | 1.0 vol% CO/10 vol% O <sub>2</sub><br>balanced with Ar; 50 ml min <sup>-1</sup><br>SV= 30,000 ml (g h)                                       | 100           | 188                  | 1         |
|                            | 7NiO/CeO <sub>2</sub>                              | 1 vol% CO/10 vol% O <sub>2</sub> balanced<br>with N <sub>2</sub> ; 100 ml min <sup>-1</sup><br>SV= 60,000 ml (g h)                           | 100           | 148                  | 2         |
|                            | 3DOM Mn <sub>2</sub> O <sub>3</sub>                | 1 vol% CO/20 vol% O <sub>2</sub> balanced<br>with N <sub>2</sub> ; 16.7 ml min <sup>-1</sup> ;<br>SV= 20,000 ml (g h)                        | 50            | 168                  | 3         |
|                            | CoZ-i-2.8<br>(Co-modified<br>ZSM-5)                | 1 vol% CO/ 1 vol% O <sub>2</sub> balanced<br>with He; 50 ml min <sup>-1</sup> ;<br>SV=2040 ml (g h)                                          | 250           | 170                  | 4         |
| Co-based catalysts         | Co <sub>3</sub> O <sub>4</sub> -DMA<br>(MOFs)      | 1.0 vol% CO/20 vol% O <sub>2</sub><br>balanced with N <sub>2</sub> ; 50 ml min <sup>-1</sup> ;<br>SV= 60,000 ml (g h)                        | 50            | 160                  | 5         |
|                            | Co-SiO <sub>2</sub> -m                             | 1 vol% CO/ 1 vol% O <sub>2</sub> balanced<br>with He; 10 ml min <sup>-1</sup> ;<br>SV=2040 ml (g h)                                          | 250           | 145                  | 6         |
|                            | 1.7Co/2Ce/Z                                        | 1.0 vol% CO/1 vol% O <sub>2</sub> balanced<br>with He; 10 ml min <sup>-1</sup> ;<br>SV=2040 ml (g h)                                         | 250           | 135                  | 7         |
|                            | 10% Ni/LaCoO <sub>3</sub>                          | 0.5 vol.% CO/7.5 10 vol.% O <sub>2</sub><br>balanced with He; 50 ml min <sup>-1</sup>                                                        | 100           | 142                  | 8         |
|                            | 0.5%AuCoCe                                         | 1.0 vol% CO/10 vol% O <sub>2</sub><br>SV= 30,000 ml (g h) balanced<br>with N <sub>2</sub> ; 50 ml min <sup>-1</sup> ;<br>SV=100,000 ml (g h) | 30            | 139                  | 9         |
| This work                  | 3D-Co <sub>16</sub> Ce <sub>1</sub> O <sub>y</sub> | 1 vol% CO/10 vol% O <sub>2</sub> balanced<br>with N <sub>2</sub> ; 100 ml min <sup>-1</sup><br>SV= 60,000 ml (g h)                           | 100           | 124.8                | This work |

**Table S2** The energy levels of *d*-band center of Co atoms in 3D-Co<sub>3</sub>O<sub>4</sub> and 3D-Co<sub>16</sub>Ce<sub>1</sub>O<sub>y</sub>.

| Sample                                                  | E <sub>ads</sub> O <sub>2</sub><br>(eV) | d <sub>O-O</sub> (Å) | E <sub>ads</sub> CO<br>(eV) | d <sub>C-O</sub> (Å) | Spin up<br>(eV) | Spin down<br>(eV) |
|---------------------------------------------------------|-----------------------------------------|----------------------|-----------------------------|----------------------|-----------------|-------------------|
| 3D-Co <sub>3</sub> O <sub>4</sub> (eV)                  | -0.679                                  | 1.32                 | -0.957                      | 1.1442               | -2.824          | -0.841            |
| 3D-Co <sub>16</sub> Ce <sub>1</sub> O <sub>y</sub> (eV) | -0.773                                  | 1.30                 | -1.267                      | 1.1441               | -3.098          | -0.682            |



## References:

1. D. Qiao, G. Lu, X. Liu, Y. Guo, Y. Wang and Y. Guo, *J. Mater. Sci.*, 2011, 46, 3500-3506.
2. X. Zhang, K. Li, W. Shi, C. Wei, X. Song, S. Yang and Z. Sun, *Nanotechnology*, 2017, 28.
3. S. Xie, H. Dai, J. Deng, H. Yang, W. Han, H. Arandiyani and G. Guo, *J Hazard Mater*, 2014, 279, 392-401.
4. M. I. Shilina, T. N. Rostovshchikova, S. A. Nikolaev and O. V. Udalova, *Mater. Chem. Phys.*, 2019, 223, 287-298.
5. C. Zhang, L. Zhang, G.-C. Xu, X. Ma, Y.-H. Li, C.-Y. Zhang and D.-Z. Jia, *New J. Chem.*, 2017, 41, 1631-1636.
6. D. A. Eurov, T. N. Rostovshchikova, M. I. Shilina, D. A. Kirilenko, M. V. Tomkovich, M. A. Yagovkina, O. V. Udalova, I. Y. Kaplin, I. A. Ivanin and D. A. Kurdyukov, *Appl. Sur. Sci*, 2022, 579.
7. M. Shilina, O. Udalova, I. Krotova, I. Ivanin and A. Boichenko, *ChemCatChem*, 2020, 12, 2556-2568.
8. H. Li, K. Yu, C. Wan, J. Zhu, X. Li, S. Tong and Y. Zhao, *Catal. Today*, 2017, 281, 534-541.
9. P. Yang and Y. Liu, *J. Ind. Eng. Chem.*, 2017, 53, 317-324.
